# Supplementary material
Source: PubMed Central journal article supplement (PMC6495547)
Supplement: NIHMS1526867-supplement-1.pdf [file NIHMS1526867-supplement-1.pdf]

**Supplementary Table 1. Strain List.**

| Strains  | Genotype                                                                                                    |
|----------|-------------------------------------------------------------------------------------------------------------|
| 579-10D  | <i>MATa ade2-1 can1-100 his3-11,15 leu2-3,112 trp1-1 ura3-1</i>                                             |
| 2190     | <i>MATa rnh202::KANMX4 ade2-1 can1-100 his3-11,15 leu2-3,112 trp1-1 ura3-1</i>                              |
| 2242-1C  | <i>MATa rnh201::NAT ade2-1 can1-100 his3-11,15 leu2-3,112 trp1-1 ura3-1</i>                                 |
| 2971     | <i>MATa rnh201-G42S ade2-1 can1-100 his3-11,15 leu2-3,112 trp1-1 ura3-1</i>                                 |
| 2977-2D  | <i>MATa rnh201-G42S ade2-1 can1-100 his3-11,15 leu2-3,112 trp1-1 ura3-1</i>                                 |
| 2924     | <i>MATa rnh202-L52R ade2-1 can1-100 his3-11,15 leu2-3,112 trp1-1 ura3-1</i>                                 |
| 2998-3D  | <i>MATa rnh202-H109R ade2-1 can1-100 his3-11,15 leu2-3,112 trp1-1 ura3-1</i>                                |
| 2995     | <i>MATa rnh202-H109R ade2-1 can1-100 his3-11,15 leu2-3,112 trp1-1 ura3-1</i>                                |
| 2917-1   | <i>MATa rnh202-L186F ade2-1 can1-100 his3-11,15 leu2-3,112 trp1-1 ura3-1</i>                                |
| 2917-2   | <i>MATa rnh202-L186F ade2-1 can1-100 his3-11,15 leu2-3,112 trp1-1 ura3-1</i>                                |
| 2996     | <i>MATa rnh202-T204I ade2-1 can1-100 his3-11,15 leu2-3,112 trp1-1 ura3-1</i>                                |
| 2990-5B  | <i>MATa rnh202-T204I ade2-1 can1-100 his3-11,15 leu2-3,112 trp1-1 ura3-1</i>                                |
| 660-2A   | <i>MATa leu2-EcoRI::URA3-leu2-BstEII ade2-1 can1-100 his3-11,15 leu2-3,112 trp1-1 ura3-1</i>                |
| 2191     | <i>MATa rnh202::KANMX4 leu2-EcoRI::URA3-leu2-BstEII ade2-1 can1-100 his3-11,15 leu2-3,112 trp1-1 ura3-1</i> |
| 2975-11A | <i>MATa rnh201-G42S leu2-EcoRI::URA3::leu2-BstEII ade2-1 can1-100 his3-11,15 leu2-3,112 trp1-1 ura3-1</i>   |
| 2960-1B  | <i>MATa rnh202-L52R leu2-EcoRI::URA3::leu2::BstEII ade2-1 can1-100 his3-11,15 leu2-3,112 trp1-1 ura3-1</i>  |
| 2998-2C  | <i>MATa rnh202-H109R leu2-EcoRI::URA3::leu2-BstEII ade2-1 can1-100 his3-11,15 leu2-3,112 trp1-1 ura3-1</i>  |
| 2941-9D  | <i>MATa rnh202-L186F leu2-EcoRI::URA3::leu2-BstEII ade2-1 can1-100 his3-11,15 leu2-3,112 trp1-1 ura3-1</i>  |
| 2990-1A  | <i>MATa rnh202-T204I leu2-EcoRI::URA3::leu2-BstEII ade2-1 can1-100 his3-11,15 leu2-3,112 trp1-1 ura3-1</i>  |
| 2904-3D  | <i>MATa lys2ΔA746NR,(AG)<sub>4</sub> ade2-1 can1-100 his3-11,15 leu2-3,112 trp1-1 ura3-1</i>                |
| 2904-7D  | <i>MATa rnh202::KANMX4 lys2ΔA746NR,(AG)<sub>4</sub> ade2-1 can1-100 his3-11,15 leu2-3,112 trp1-1 ura3-1</i> |
| 2A*      | <i>MATa rnh201-G42S lys2ΔA746NR,(AG)<sub>4</sub> ade2-1 can1-100 his3-11,15 leu2-3,112 trp1-1 ura3-1</i>    |
| 2957-13B | <i>MATa rnh202-L52R lys2ΔA746NR,(AG)<sub>4</sub> ade2-1 can1-100 his3-11,15 leu2-3,112 trp1-1 ura3-1</i>    |
| 2997-1D  | <i>MATa rnh202-H109R lys2ΔA746NR,(AG)<sub>4</sub> ade2-1 can1-100 his3-11,15 leu2-3,112 trp1-1 ura3-1</i>   |
| 2935-1B  | <i>MATa rnh202-L186F lys2ΔA746NR,(AG)<sub>4</sub> ade2-1 can1-100 his3-11,15 leu2-3,112 trp1-1 ura3-1</i>   |
| 2999-1C  | <i>MATa rnh202-T204I lys2ΔA746NR,(AG)<sub>4</sub> ade2-1 can1-100 his3-11,15 leu2-3,112 trp1-1 ura3-1</i>   |
| 604-17C  | <i>MATa rad50::hisG-URA3-hisG RAD5+ ade2-1 can1-100 his3-11,15 leu2-3,112 trp1-1 ura3-1</i>                 |
| 2198     | <i>MATa rnh1::hphMX4 leu2-3, 112 his3-11, 15 ade2-1 ura3-1 trp1-1 can1-100</i>                              |
| 2459-1   | <i>MATa top1::hphMX4 leu2-3, 112 his3-11, 15 ade2-1 ura3-1 trp1-1 can1-100</i>                              |
